# Supplementary material for: Robust lanthanide MOFs as multifunctional luminescent sensors for intelligent visualization monitoring of MEAA and texture code anti-counterfeiting applications
Source: Royal Society of Chemistry journal article supplement (doi:10.1039/d4tc00658e), 2024-01-01
Supplement: d4tc00658e1.pdf [file d4tc00658e1.pdf]

## *Electronic Supplementary Information*

### **Robust lanthanide MOFs as multifunctional luminescent sensors for intelligent visualization monitoring of MEAA and texture code anti-counterfeiting applications**

Hui-Min Yang, Guo-Ping Yang \*, and Yao-Yu Wang \*

*Key Laboratory of Synthetic and Natural Functional Molecule of the Ministry of Education, Shaanxi Key Laboratory of Physico-Inorganic Chemistry, Xi'an Key Laboratory of Functional Supramolecular Structure and Materials, College of Chemistry and Materials Science, Northwest University, Xi'an 710127, P.R. China*

*E-mail: [ygp@nwu.edu.cn](mailto:ygp@nwu.edu.cn); [wyaoyu@nwu.edu.cn](mailto:wyaoyu@nwu.edu.cn).*

## Table of Contents

### Supporting Fig.

|                 |                                                                                                                                  |
|-----------------|----------------------------------------------------------------------------------------------------------------------------------|
| <b>Fig. S1</b>  | FT-IR spectrogram of <b>1-Eu</b> and <b>1-Tb</b>                                                                                 |
| <b>Fig. S2</b>  | Coordination modes of $L^{2-}$ in <b>1-Eu</b>                                                                                    |
| <b>Fig. S3</b>  | The TGA curves of (a) <b>1-Eu</b> and (b) <b>1-Tb</b>                                                                            |
| <b>Fig. S4</b>  | PXRD patterns of simulated <b>1-Eu</b> and synthesized samples of <b>1-Eu</b> and <b>1-Tb</b>                                    |
| <b>Fig. S5</b>  | PXRD patterns of <b>1-Eu</b> water tolerability experiments                                                                      |
| <b>Fig. S6</b>  | The PXRD patterns of <b>1-Eu</b> in different pH conditions                                                                      |
| <b>Fig. S7</b>  | (a) Excitation and emission spectra of <b>H<sub>2</sub>L</b>                                                                     |
| <b>Fig. S8</b>  | (a) Excitation and (b) emission spectra of <b>1-Eu</b>                                                                           |
| <b>Fig. S9</b>  | The CIE coordinates of (a) <b>1-Eu</b> and (b) <b>1-Tb</b>                                                                       |
| <b>Fig. S10</b> | (a) Excitation and (b) emission spectra of <b>1-Tb</b>                                                                           |
| <b>Fig. S11</b> | Schematic diagram of the energy absorption, transfer and emission processes of <b>1-Eu</b> and <b>1-Tb</b>                       |
| <b>Fig. S12</b> | Emission spectra of <b>1-Eu</b> before and after soaking in deionized water for 7 days                                           |
| <b>Fig. S13</b> | Emission intensity of <b>1-Eu</b> at different (a) pH and (b) solvents                                                           |
| <b>Fig. S14</b> | PXRD patterns of a series of bimetallic MOFs <b>1-Eu<sub>x</sub>Tb<sub>1-x</sub></b>                                             |
| <b>Fig. S15</b> | Luminescent decay curves of (a) <b>1-Eu</b> and (b) <b>1-Tb</b>                                                                  |
| <b>Fig. S16</b> | Schematic diagram of energy transfer processes in <b>1-Eu<sub>x</sub>Tb<sub>1-x</sub></b>                                        |
| <b>Fig. S17</b> | Different components were added to simulate the relative fluorescence intensity of <b>1-Eu</b> in (a) urine and (b) blood        |
| <b>Fig. S18</b> | Fluorescence responses of <b>1-Eu</b> in the presence of various (a) urine and (b) blood substances before and after adding MEAA |
| <b>Fig. S19</b> | Relative fluorescence intensity and sensing ability(MEAA) of <b>1-Eu</b> suspensions in different solvents                       |
| <b>Fig. S20</b> | Relative fluorescence intensity and sensing ability(MEAA) of <b>1-Eu</b> suspensions in different alcohols                       |
| <b>Fig. S21</b> | SEM images of <b>1-Eu</b> (a) before and (b) after 6 cycles                                                                      |
| <b>Fig. S22</b> | PXRD patterns of <b>1-Eu</b> before and after 6 cycles                                                                           |
| <b>Fig. S23</b> | XPS images of <b>1-Eu</b> before and after adding MEAA                                                                           |
| <b>Fig. S24</b> | Histogram of MEAA concentration to <b>1-Eu</b> emission intensity ratios                                                         |
| <b>Fig. S25</b> | UV-vis absorption spectra of MEAA and the excitation and emission spectra of <b>1-Eu</b>                                         |
| <b>Fig. S26</b> | Schematic diagram of PET energy transfer processes.                                                                              |
| <b>Fig. S27</b> | Luminescence lifetime patterns of <b>1-Eu</b> suspensions with the presence of MEAA of different concentrations.                 |

### Supporting Tables

|                 |                                                                                         |
|-----------------|-----------------------------------------------------------------------------------------|
| <b>Table S1</b> | Crystallographic Data of <b>1-Eu</b> and <b>1-Tb</b>                                    |
| <b>Table S2</b> | Selected bond lengths (Å) and bond angles (°) for <b>1-Eu</b> and <b>1-Tb</b>           |
| <b>Table S3</b> | Comparison chemical and thermal stability conditions of selected stable MOFs            |
| <b>Table S4</b> | ICP-AES results of a series of bimetallic-doped <b>1-Eu<sub>x</sub>Tb<sub>1-x</sub></b> |
| <b>Table S5</b> | Photoluminescence data of <b>1-Ln</b> and <b>1-Eu<sub>x</sub>Tb<sub>1-x</sub></b>       |
| <b>Table S6</b> | HOMO and LUMO Energies for <b>H<sub>2</sub>L</b> and MEAA                               |
| <b>Table S7</b> | The hexadecimal color codes of each color block of QR code                              |

### Section S1 Materials, Characterization and Synthesis Methods.

All the reagents and solvents were purchased to use without further purification in the experiments. Infrared spectra were examined on Bruker EQUINOX-55 spectrophotometer in 4000–400  $\text{cm}^{-1}$  (KBr pellets). Powder X-ray diffraction patterns were investigated through Bruker D8 ADVANCE X-ray powder diffractometer. Thermogravimetric analyses were tested on NETZSCH STA 449C microanalyzer ( $\text{N}_2$  atmosphere,  $10\text{ }^\circ\text{C min}^{-1}$ ). UV-vis spectra were measured on Hitachi U-3310 spectrometer. Luminescent spectra and luminescence lifetimes were determined on an Edinburgh FLS920 fluorescence spectrometer. The quantum efficiency was tested by an integrating sphere on a FluoroMax-4 spectrophotometer. The bimetallic doping molar ratio was determined by inductively coupled plasma mass spectrometry (ICP-MS) Agilent 7900. X-ray photoelectron spectroscopy (XPS) was carried out on the UIVAC-PHI 5000 Versa Probe with Al target as the excitation source.

### Section S2 X-ray Crystal Structure Determination.

The single-crystal X-ray diffractions were tested on Bruker SMART APEX II CCD diffractometer equipped with graphite monochromated Mo  $K\alpha$  radiation ( $\lambda = 0.71073\text{\AA}$ ) via  $\phi/\omega$  scan method. The diffraction data were corrected for Lorentz and polarization effects for empirical absorption based on multiscan. The structures were solved by the direct methods and refined on  $F^2$  via *SHELXTL* program.<sup>18</sup> The anisotropic thermal parameters were applied to non-hydrogen atoms. The hydrogen atoms of ligands were calculated and added at ideal positions. Table S1 and Table S2 summarized X-ray crystallographic data and refinement details for **1-Eu** and **1-Tb**. The CCDC reference numbers were 2308030 and 2308031 for **1-Eu** and **1-Tb**.

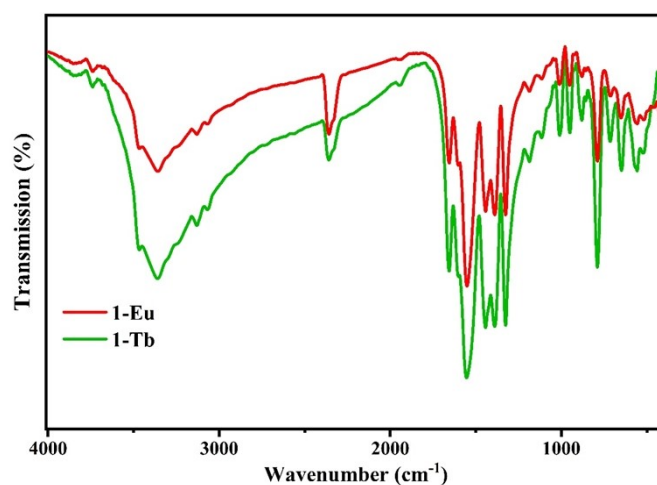

**Fig. S1.** FT-IR spectrogram of **1-Eu** and **1-Tb**.

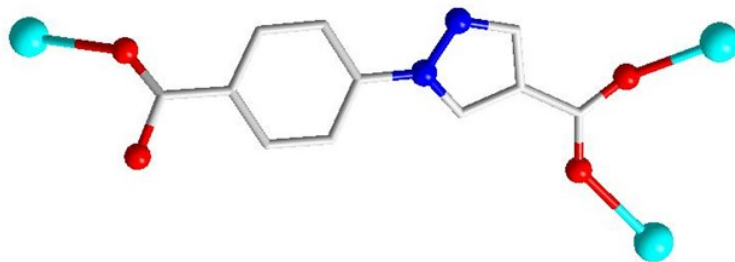

**Fig. S2.** Coordination modes of  $L^{2-}$  in **1-Eu**.

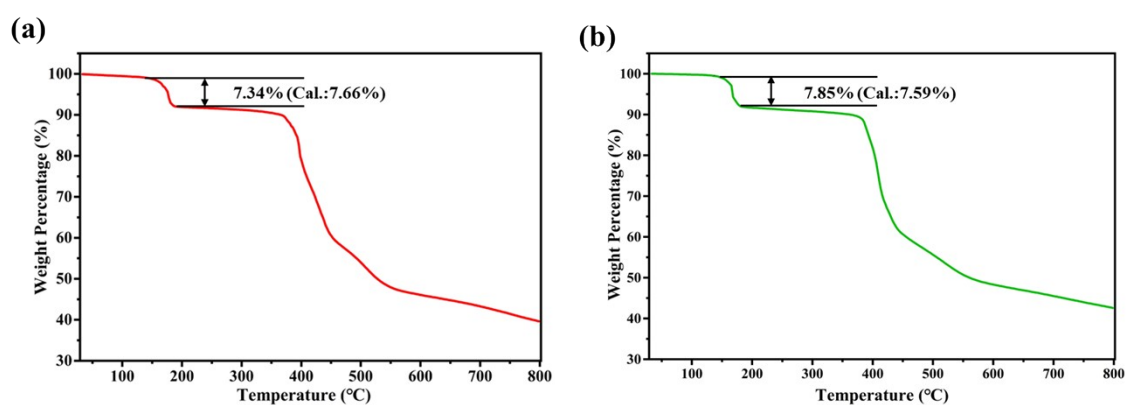

**Fig. S3.** The thermogravimetric (TGA) curves of (a) **1-Eu** and (b) **1-Tb** under  $N_2$  environment.

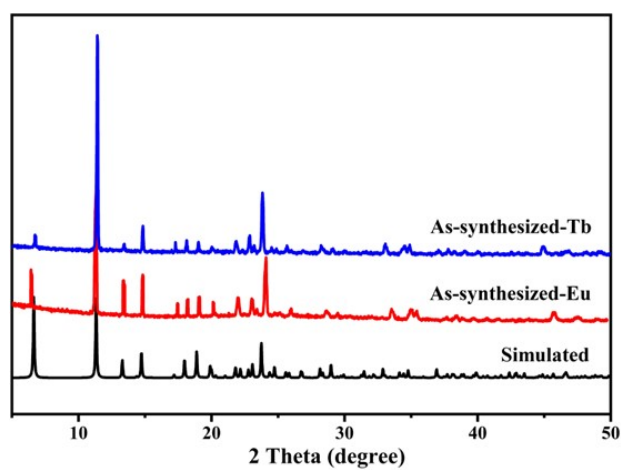

**Fig. S4.** PXRD patterns of **1-Eu** simulated from the X-ray single-crystal structure and as-synthesized samples of **1-Eu** and **1-Tb**.

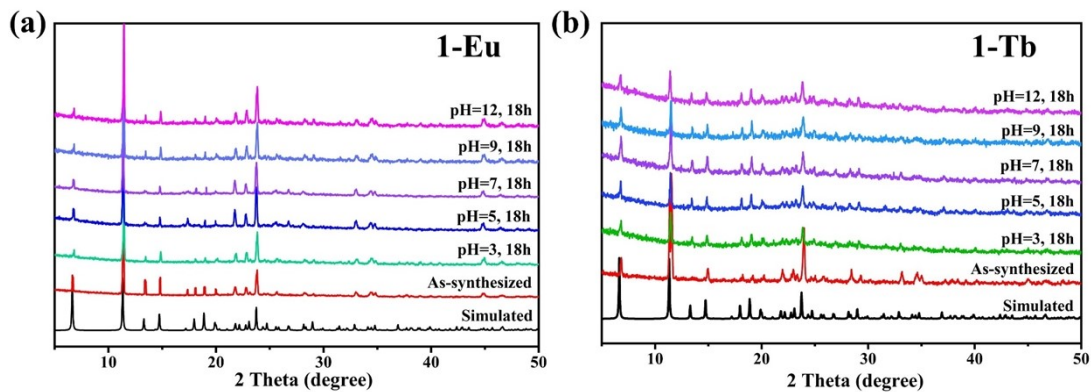

Fig. S5. PXRD patterns in different pH: (a) 1-Eu; (b) 1-Tb.

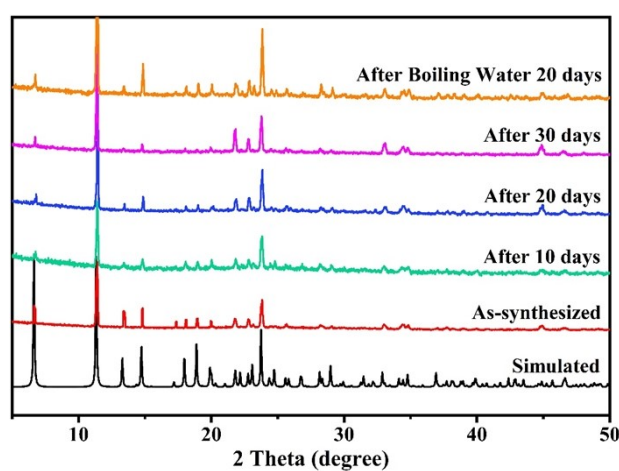

Fig. S6. PXRD patterns of 1-Eu water tolerability experiments.

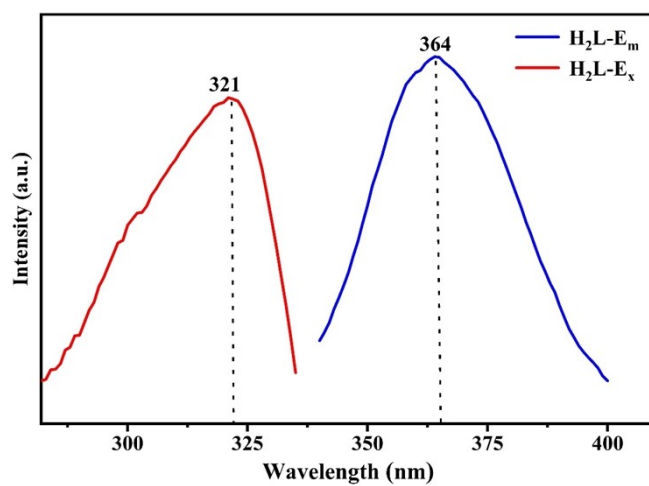

Fig. S7. (a) Excitation and emission spectra of  $H_2L$  ( $\lambda_{ex} = 321$  nm).

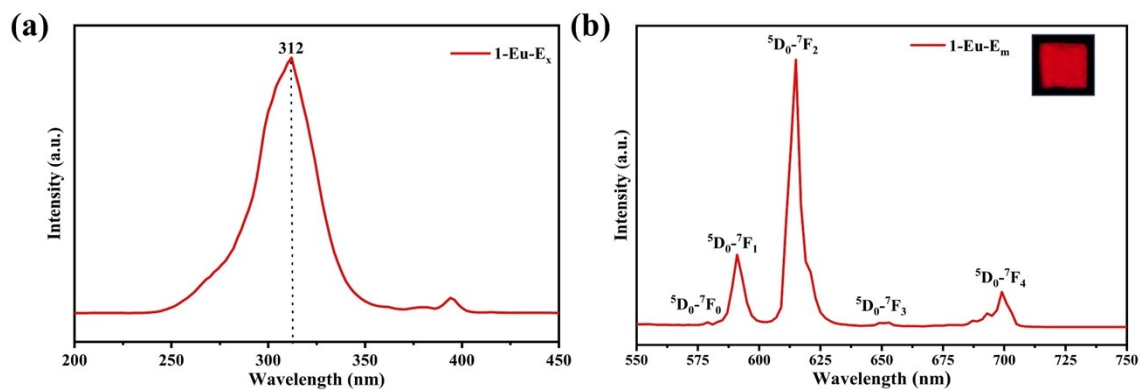

**Fig. S8.** (a) Excitation and (b) emission spectra of **1-Eu** (Inset, the image of **1-Eu** under the irradiation at 254 nm).

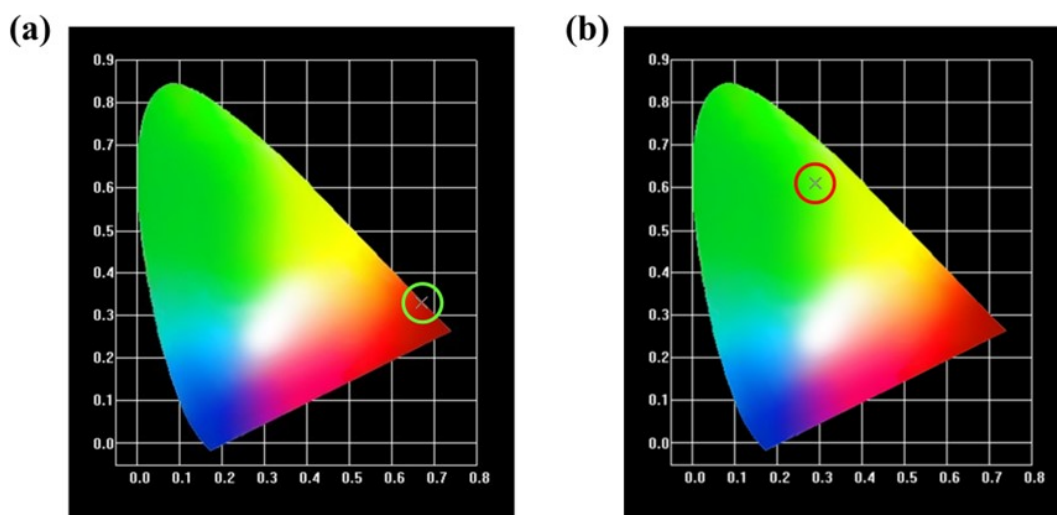

**Fig. S9.** CIE coordinates of (a) **1-Eu** and (b) **1-Tb**.

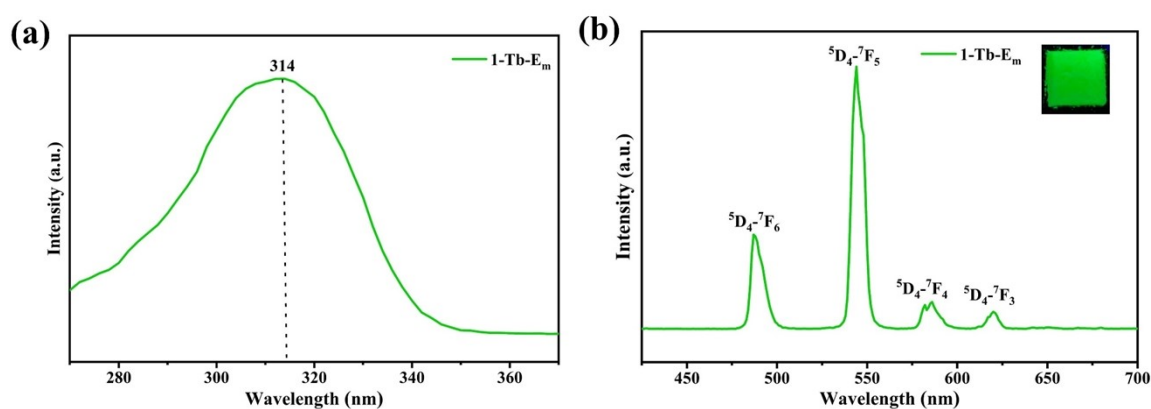

**Fig. S10.** (a) Excitation and (b) emission spectra of **1-Tb** (Inset, the image of **1-Tb** under the irradiation at 254 nm).

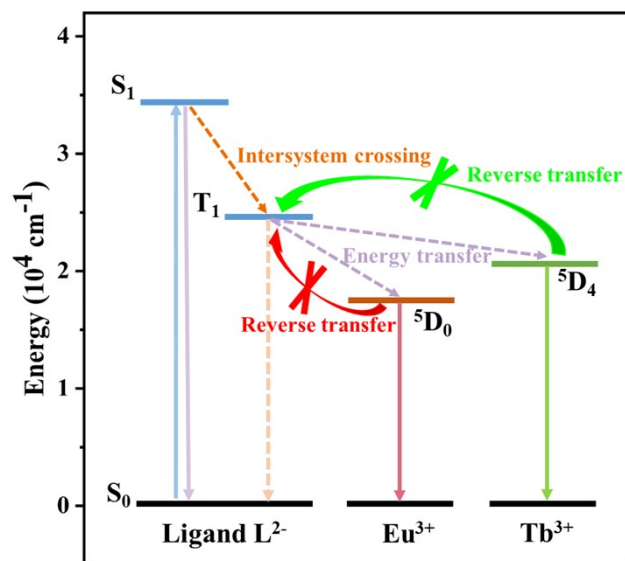

**Fig. S11.** Schematic diagram of the energy absorption, transfer and emission processes of **1-Eu** and **1-Tb**.

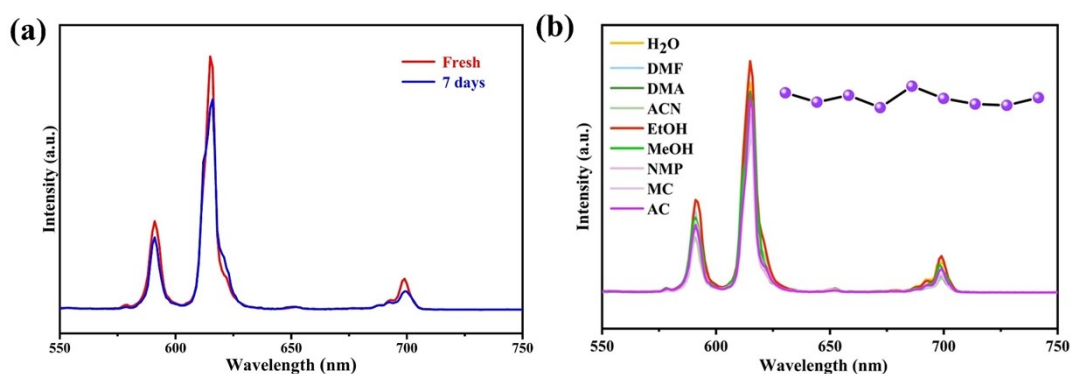

**Fig. S12.** Emission spectra of **1-Eu** (a) before and after soaking in deionized water for 7 days; (b) in different solvents.

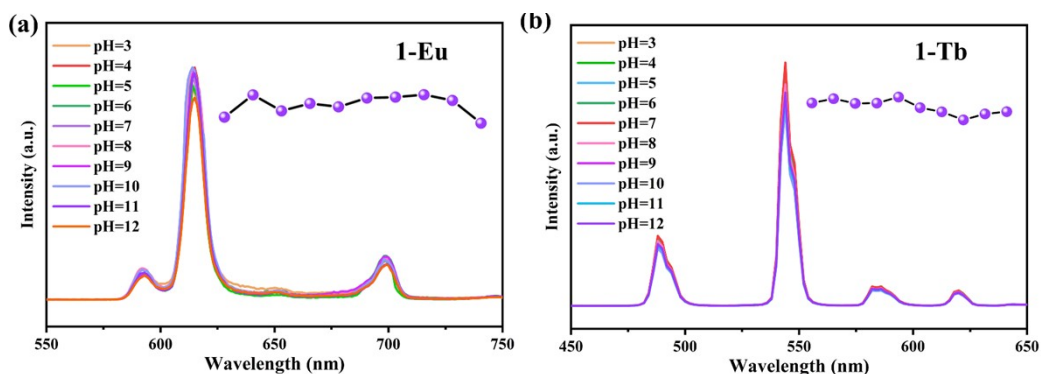

**Fig. S13.** Emission intensity in different pH of (a) **1-Eu**; (b) **1-Tb**.

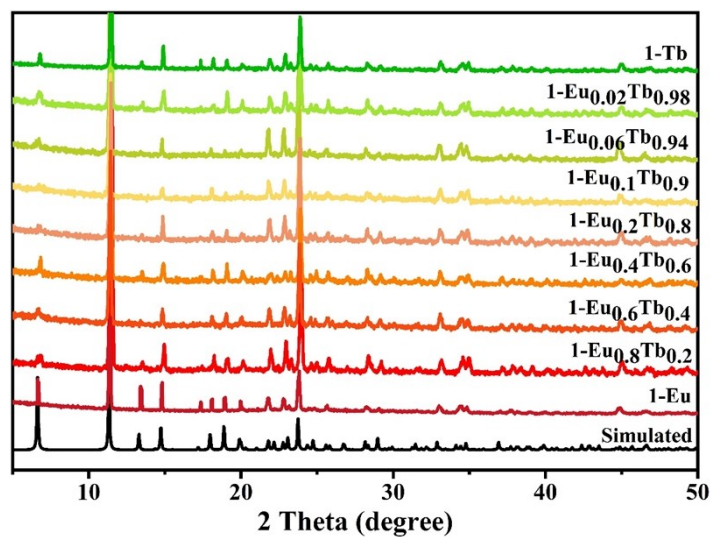

Fig. S14. PXRD patterns for a series of MOFs  $1\text{-Eu}_x\text{Tb}_{1-x}$ .

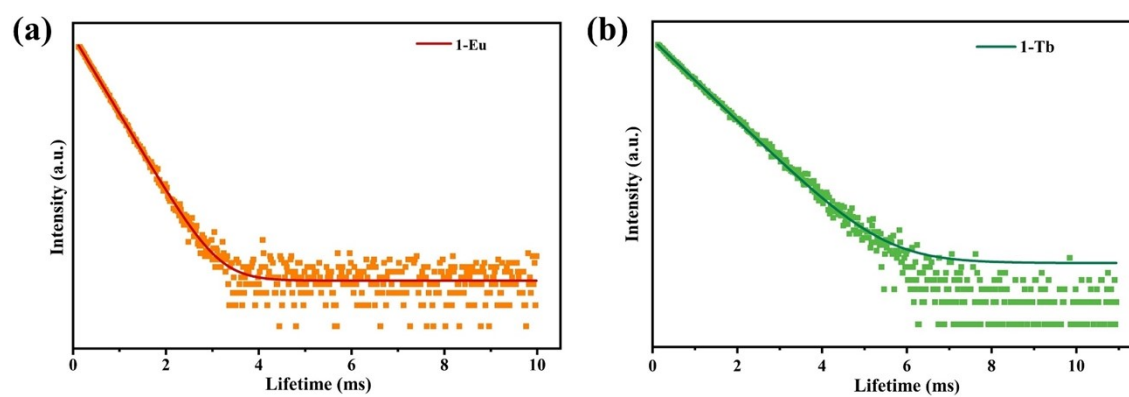

Fig. S15. Luminescent decay curves of (a)  $1\text{-Eu}$  and (b)  $1\text{-Tb}$ .

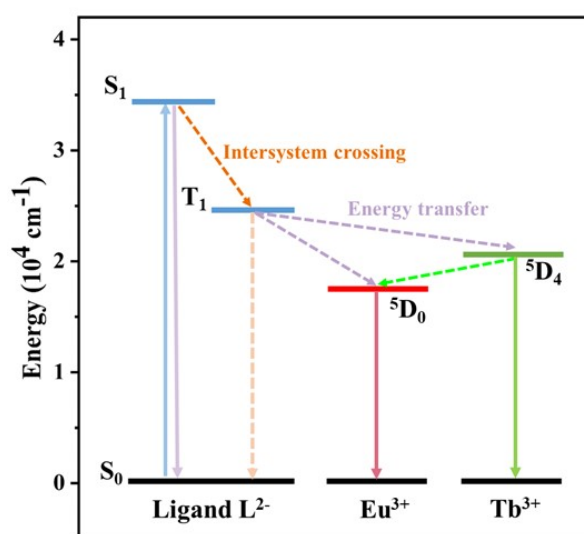

Fig. S16. Schematic diagram of energy transfer processes in  $1\text{-Eu}_x\text{Tb}_{1-x}$ .



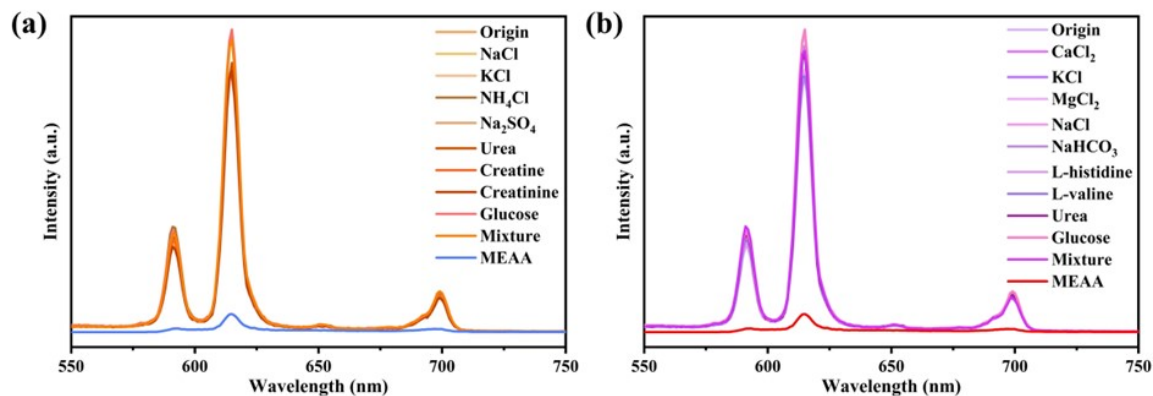

**Fig. S17.** Different components were added to simulate the relative fluorescence intensity of **1-Eu** in (a) urine and (b) blood.

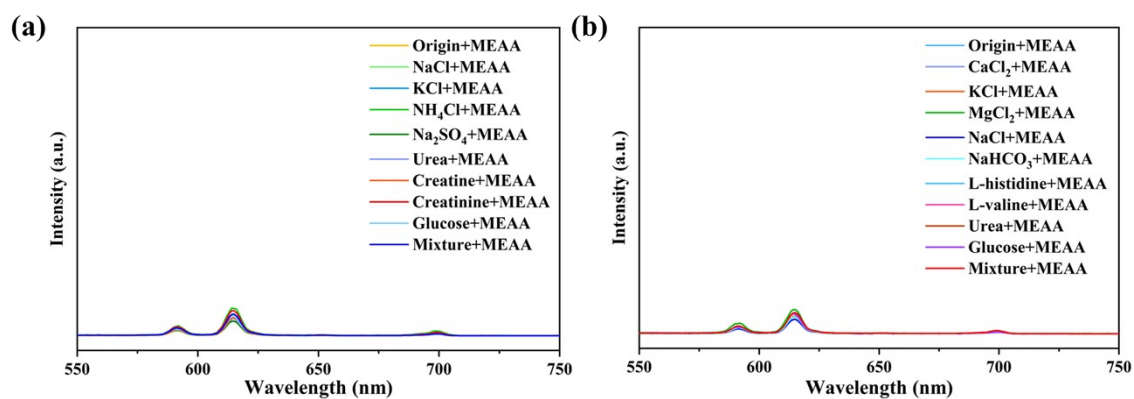

**Fig. S18.** Fluorescence responses of **1-Eu** in the presence of various (a) urine and (b) blood substances before and after adding MEAA.

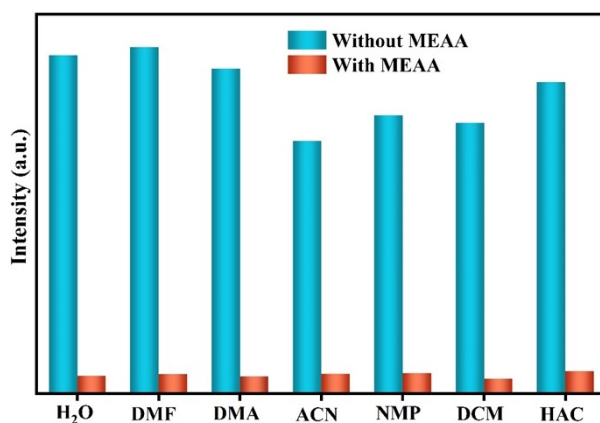

**Fig. S19.** Relative fluorescence intensity and sensing ability (MEAA) of **1-Eu** suspensions in different solvents (DMF: N,N-Dimethylformamide ; DMA: N,N- Dimethylacetamide; ACN: Acetonitrile; NMP: 1-Methyl-2-pyrrolidinone; DCM: Dichloromethane; HAC: acetic acid).

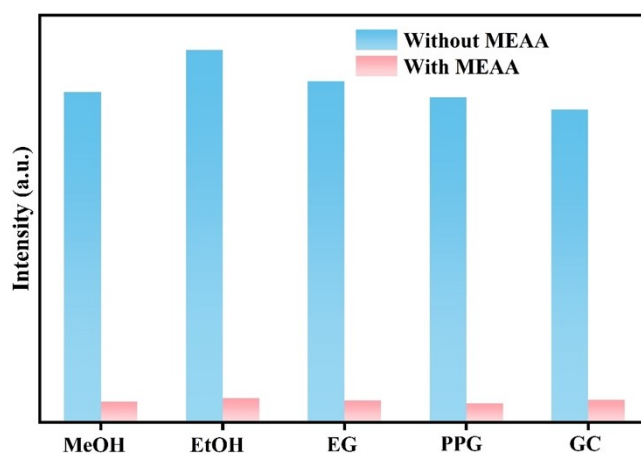

**Fig. S20.** Relative fluorescence intensity and sensing ability(MEAA) of **1-Eu** suspensions in different alcohols(MeOH: methanol; EtOH: ethanol; EG: ethylene glycol; PPG: propylene glycol; GC: glycerin).

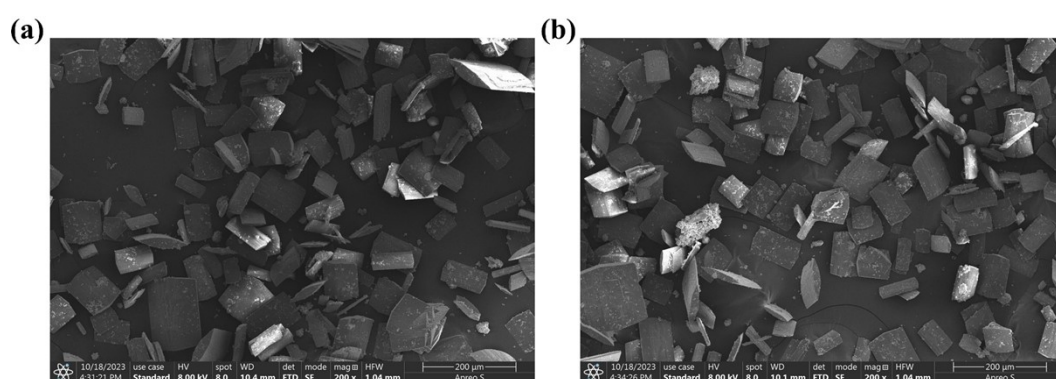

**Fig. S21.** The SEM images of **1-Eu** (a) before and (b) after 6 cycles.

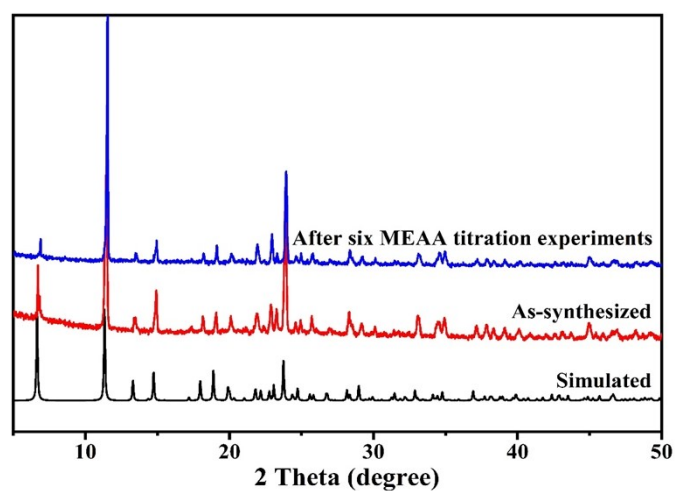

**Fig. S22.** PXRD patterns of **1-Eu** before and after 6 cycles.

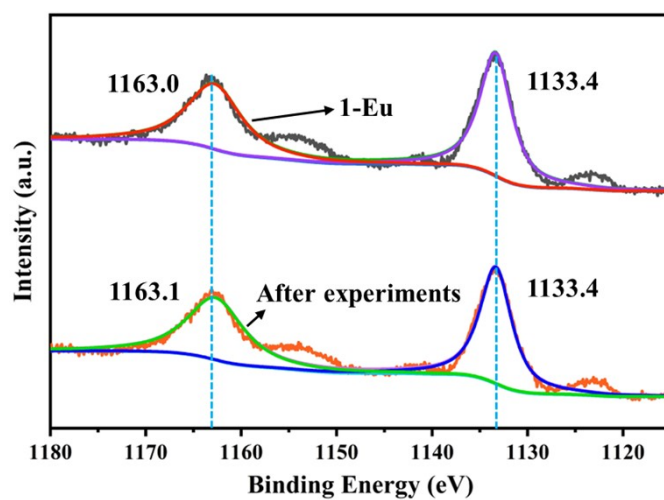

Fig. S23. XPS images of **1-Eu** before and after adding MEAA.

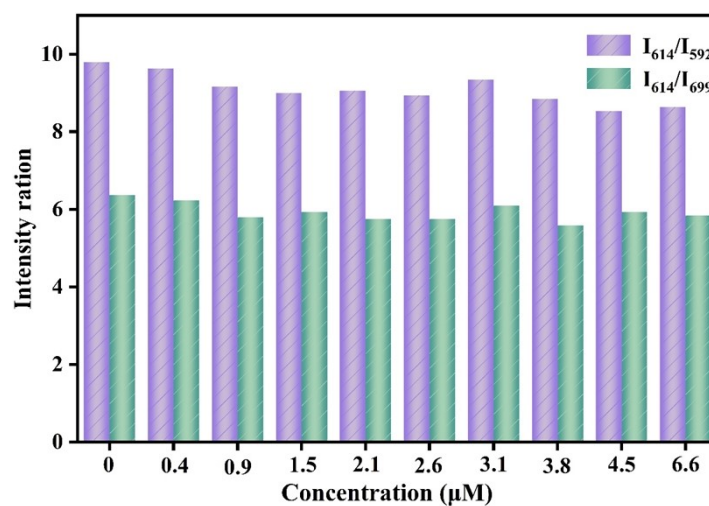

Fig. S24. Histogram of MEAA concentration to **1-Eu** emission intensity ratios.

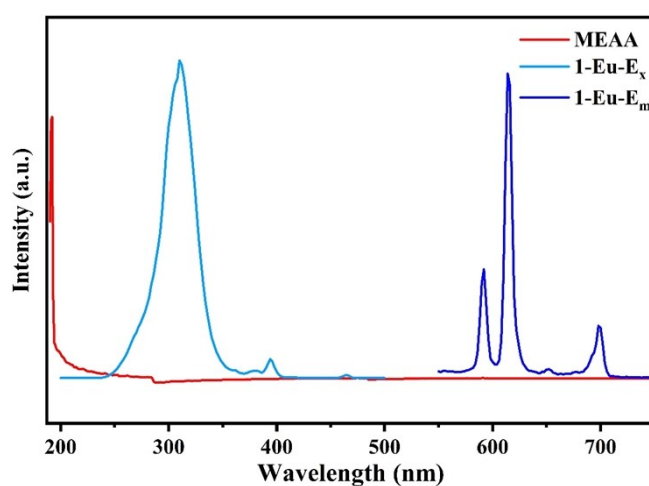

Fig. S25. UV-vis absorption spectra of MEAA and the excitation and emission spectra of **1-Eu**.

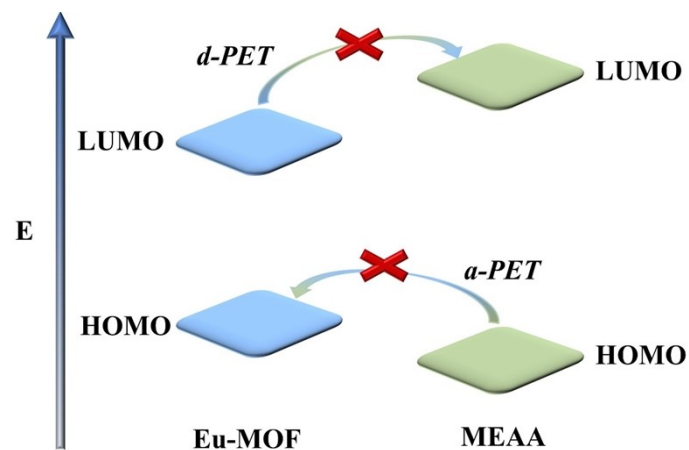

**Fig. S26.** Schematic diagram of PET energy transfer processes.

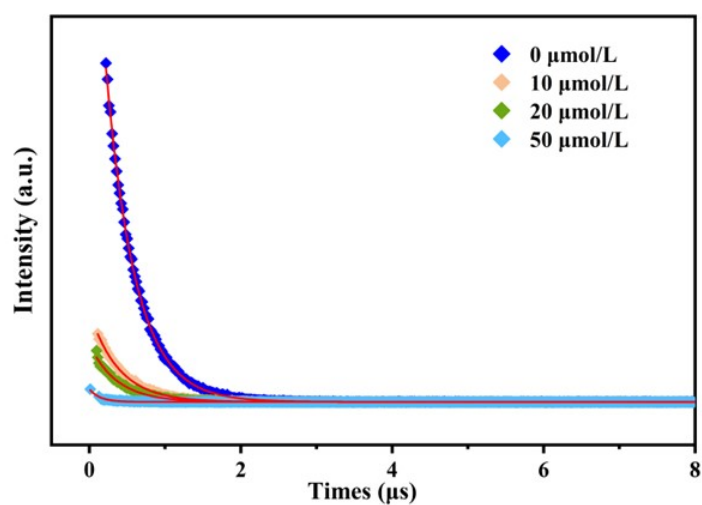

**Fig. S27.** Luminescence lifetime patterns of  ${}^5\text{D}_0$  in **1-Eu** suspensions with the presence of MEAA of different concentrations.

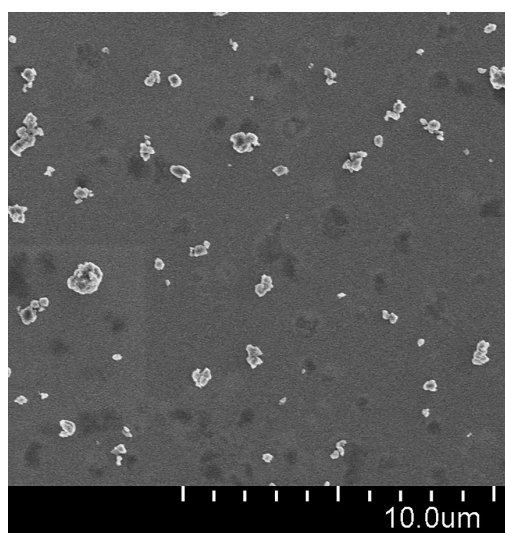

**Fig. S28.** SEM image of **1-Ln** after grinding.

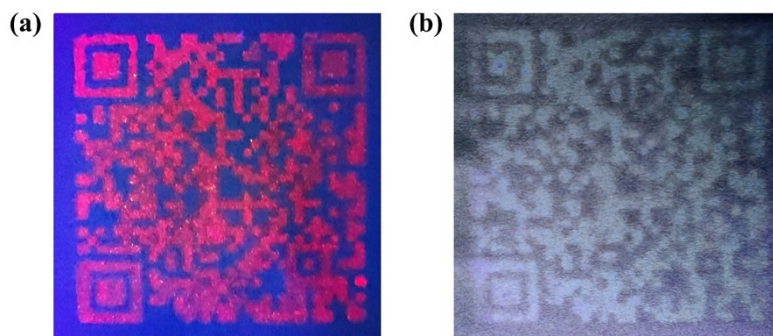

**Fig. S29.** QR code in different conditions after (a) six months; (b) the luminescent quenching of MEAA.

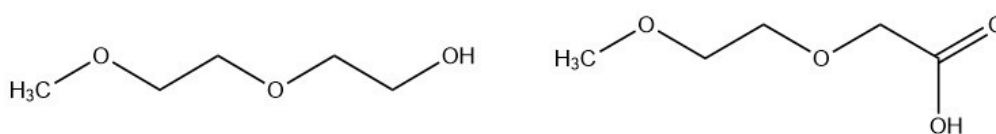

**Scheme S1.** Structures of 2-(2-methoxyethoxy)ethanol and 2-(2-methoxyethoxy)acetic acid .

**Table S1.** Crystallographic data of **1-Eu** and **1-Tb**.

| complex                                                         | 1-Eu                                                                           | 1-Tb                                                                           |
|-----------------------------------------------------------------|--------------------------------------------------------------------------------|--------------------------------------------------------------------------------|
| empirical formula                                               | Eu <sub>0.5</sub> C <sub>11</sub> H <sub>9</sub> N <sub>2</sub> O <sub>5</sub> | Tb <sub>0.5</sub> C <sub>11</sub> H <sub>9</sub> N <sub>2</sub> O <sub>5</sub> |
| formula mass                                                    | 325.18                                                                         | 328.66                                                                         |
| crystal system                                                  | Orthorhombic                                                                   | Orthorhombic                                                                   |
| space group                                                     | <i>Pccn</i>                                                                    | <i>Pccn</i>                                                                    |
| <i>a</i> [Å]                                                    | 26.6183(13)                                                                    | 26.5851(16)                                                                    |
| <i>b</i> [Å]                                                    | 8.1659(4)                                                                      | 8.1405(5)                                                                      |
| <i>c</i> [Å]                                                    | 10.0386(5)                                                                     | 10.0208(6)                                                                     |
| $\alpha$ [°]                                                    | 90                                                                             | 90                                                                             |
| $\beta$ [°]                                                     | 90                                                                             | 90                                                                             |
| $\gamma$ [°]                                                    | 90                                                                             | 90                                                                             |
| <i>V</i> [Å <sup>3</sup> ]                                      | 2182.01(19)                                                                    | 2168.7(2)                                                                      |
| <i>Z</i>                                                        | 8                                                                              | 8                                                                              |
| $\rho_{\text{calcd}}$ [g cm <sup>-3</sup> ]                     | 1.980                                                                          | 2.013                                                                          |
| $\mu$ [mm <sup>-1</sup> ]                                       | 2.945                                                                          | 3.332                                                                          |
| <i>F</i> [000]                                                  | 1284                                                                           | 1292                                                                           |
| $\theta$ [°]                                                    | 3.061-25.444                                                                   | 3.314 -25.345                                                                  |
| reflections collected                                           | 10355                                                                          | 15503                                                                          |
| goodness-of-fit on <i>F</i> <sup>2</sup>                        | 1.003                                                                          | 1.200                                                                          |
| <i>R</i> <sub>1</sub> <sup>a</sup> [ <i>I</i> > 2σ( <i>I</i> )] | 0.0343                                                                         | 0.0259                                                                         |
| <i>wR</i> <sub>2</sub> <sup>b</sup> (all data)                  | 0.0771                                                                         | 0.0537                                                                         |

$${}^a R_1 = \frac{\sum ||F_o| - |F_c||}{\sum |F_o|}, \quad {}^b wR_2 = \left[ \frac{\sum w(F_o^2 - F_c^2)^2}{\sum w(F_o^2)^2} \right]^{1/2}$$

**Table S2.** Selected bond lengths (Å) and bond angles (°) for **1-Eu** and **1-Tb**.

| <b>1-Eu</b>         |            |                     |            |
|---------------------|------------|---------------------|------------|
| Eu(1)-O(1)#1        | 2.321(3)   | O(3)#3-Eu(1)-O(3)   | 118.38(17) |
| Eu(1)-O(1)#2        | 2.321(3)   | O(3)-Eu(1)-O(4)#5   | 73.97(12)  |
| Eu(1)-O(3)          | 2.454(4)   | O(3)#3-Eu(1)-O(4)#5 | 134.40(11) |
| Eu(1)-O(3)#3        | 2.454(4)   | O(3)#3-Eu(1)-O(4)#4 | 73.97(12)  |
| Eu(1)-O(4)#4        | 2.513(3)   | O(3)-Eu(1)-O(4)#4   | 134.40(11) |
| Eu(1)-O(4)#5        | 2.513(3)   | O(4)#4-Eu(1)-O(4)#5 | 131.16(15) |
| Eu(1)-O(5)#3        | 2.405(3)   | O(5)-Eu(1)-O(3)#3   | 70.99(12)  |
| Eu(1)-O(5)          | 2.405(3)   | O(5)#3-Eu(1)-O(3)   | 70.99(12)  |
| O(1)#1-Eu(1)-O(1)#2 | 90.53(18)  | O(5)#3-Eu(1)-O(3)#3 | 76.35(12)  |
| O(1)#2-Eu(1)-O(3)#3 | 82.78(13)  | O(5)-Eu(1)-O(3)     | 76.35(12)  |
| O(1)#1-Eu(1)-O(3)   | 82.78(13)  | O(5)-Eu(1)-O(4)#4   | 142.27(12) |
| O(1)#1-Eu(1)-O(3)#3 | 147.85(12) | O(5)-Eu(1)-O(4)#5   | 70.28(11)  |
| O(1)#2-Eu(1)-O(3)   | 147.85(12) | O(5)#3-Eu(1)-O(4)#5 | 142.27(12) |
| O(1)#1-Eu(1)-O(4)#5 | 72.11(8)   | O(5)#3-Eu(1)-O(4)#4 | 70.28(11)  |
| O(1)#2-Eu(1)-O(4)#4 | 72.11(8)   | O(5)#3-Eu(1)-O(5)   | 113.48(17) |
| O(1)#1-Eu(1)-O(4)#4 | 74.05(12)  | C(10)-O(1)-Eu(1)#6  | 147.2(3)   |
| O(1)#2-Eu(1)-O(4)#5 | 74.05(12)  | Eu(1)-O(3)-H(3A)    | 109.3      |
| O(1)#2-Eu(1)-O(5)#3 | 140.69(12) | Eu(1)-O(3)-H(3B)    | 110.0      |
| O(1)#1-Eu(1)-O(5)#3 | 89.90(11)  | C(5)-O(4)-Eu(1)#5   | 134.9(4)   |
| O(1)#1-Eu(1)-O(5)   | 140.69(12) | C(10)-O(5)-Eu(1)    | 136.8(3)   |
| O(1)#2-Eu(1)-O(5)   | 89.90(11)  |                     |            |
| <b>1-Tb</b>         |            |                     |            |
| Tb(1)-O(1)          | 2.445(3)   | O(4)#4-Tb(1)-O(4)#5 | 130.83(13) |
| Tb(1)-O(1)#1        | 2.445(3)   | O(5)-Tb(1)-O(1)#1   | 148.19(10) |
| Tb(1)-O(3)#2        | 2.390(3)   | O(5)#1-Tb(1)-O(1)#1 | 82.73(10)  |
| Tb(1)-O(3)#3        | 2.390(3)   | O(5)-Tb(1)-O(1)     | 82.72(10)  |
| Tb(1)-O(4)#4        | 2.491(3)   | O(5)-Tb(1)-O(3)#2   | 140.48(10) |
| Tb(1)-O(4)#5        | 2.491(3)   | O(5)#1-Tb(1)-O(3)#3 | 140.48(10) |
| Tb(1)-O(5)#1        | 2.296(3)   | O(5)#1-Tb(1)-O(3)#2 | 90.39(10)  |
| Tb(1)-O(5)          | 2.296(3)   | O(5)-Tb(1)-O(3)#3   | 90.39(10)  |
| Tb(1)-O(1)          | 2.445(3)   | O(5)-Tb(1)-O(4)#4   | 74.36(10)  |
| O(1)#1-Tb(1)-O(1)   | 118.35(14) | O(5)#1-Tb(1)-O(4)#5 | 74.36(10)  |
| O(1)#1-Tb(1)-O(4)#5 | 134.61(9)  | O(5)-Tb(1)-O(4)#5   | 71.48(9)   |
| O(1)-Tb(1)-O(4)#5   | 73.99(10)  | O(5)#1-Tb(1)-O(4)#4 | 71.48(9)   |
| O(1)#1-Tb(1)-O(4)#4 | 73.98(10)  | O(5)-Tb(1)-O(5)#1   | 90.24(14)  |

|                     |            |                     |            |
|---------------------|------------|---------------------|------------|
| O(1)-Tb(1)-O(4)#4   | 134.61(9)  | Tb(1)-O(1)-H(1A)    | 109.2      |
| O(3)#3-Tb(1)-O(1)#1 | 76.29(10)  | Tb(1)-O(1)-H(1B)    | 109.3      |
| O(3)#2-Tb(1)-O(1)#1 | 70.84(10)  | O(5)-Tb(1)-O(1)#1   | 148.19(10) |
| O(3)#3-Tb(1)-O(1)   | 70.84(10)  | O(5)#1-Tb(1)-O(1)#1 | 82.73(10)  |
| O(3)#2-Tb(1)-O(1)   | 76.29(10)  | O(5)-Tb(1)-O(1)     | 82.72(10)  |
| O(3)#2-Tb(1)-O(3)#3 | 113.06(14) | O(5)-Tb(1)-O(3)#2   | 140.48(10) |
| O(3)#2-Tb(1)-O(4)#5 | 70.71(9)   | C(3)-O(3)-Tb(1)#6   | 137.0(2)   |
| O(3)#3-Tb(1)-O(4)#5 | 142.12(10) | C(9)-O(4)-Tb(1)#7   | 134.8(3)   |
| O(3)#3-Tb(1)-O(4)#4 | 70.71(9)   | C(3)-O(5)-Tb(1)     | 146.9(3)   |
| O(3)#2-Tb(1)-O(4)#4 | 142.12(10) |                     |            |

Symmetry transformations used to generate equivalent atoms:

**1-Eu:** #1  $-x+3/2, y, z+1/2$ ; #2  $x, -y+3/2, z+1/2$ ; #3  $-x+3/2, -y+3/2, z$ ; #4  $x+1/2, y+1/2, -z+1$ ; #5  $-x+1, -y+1, -z+1$ ; #6  $x, -y+3/2, z-1/2$ . **1-Tb:** #1  $-x+1/2, -y+3/2, z$ ; #2  $-x+1/2, y, z-1/2$ ; #3  $x, -y+3/2, z-1/2$ ; #4  $-x+1, y+1/2, -z+3/2$ ; #5  $x-1/2, -y+1, -z+3/2$ ; #6  $x, -y+3/2, z+1/2$ ; #7  $-x+1, y-1/2, -z+3/2$ .

**Table S3.** Comparison chemical and thermal stability conditions of selected stable MOFs.

| MOFs                                                     | Chemical stability                                                                 | Thermal stability (°C) | Ref.      |
|----------------------------------------------------------|------------------------------------------------------------------------------------|------------------------|-----------|
| <b>1-Eu</b>                                              | pH = 3-12 for 12 h, water for 30 days, boiling water for 20 days                   | 375                    | This work |
| NIIC1-Ln                                                 | pH = 2-12 for 3 h, Water for 5 days, boiling water for 7 days                      | 450                    | 1         |
| LCP                                                      | pH = 2-10 for 12 h, organic and Water for 12 h                                     | -                      | 2         |
| CMERI-1&2                                                | Soaked in HCl(PH = 3) and NaOH(4 M)                                                | 286 & 350              | 3         |
| B-EuMOF                                                  | pH = 4-8, Water for 48 h                                                           | 400                    | 4         |
| [Cd <sub>3</sub> (BDC) <sub>3</sub> (DMF) <sub>2</sub> ] | —                                                                                  | 310                    | 5         |
| BCD@EuBTC                                                | —                                                                                  | 370                    | 6         |
| NOTT-220                                                 | pH = 2-12 and water for 7 days                                                     | 390                    | 7         |
| S-1                                                      | pH = 4-12 for 4 h, organic solvents for 10 h, water and boiling water for 10 weeks | 310                    | 8         |
| PCN-601                                                  | 0.1 mM HCl, 10 M NaOH (100 °C) for 1day                                            | 500                    | 9         |
| FJU-99                                                   | Some organic solvents                                                              | 200                    | 10        |

**Table S4.** ICP-AES results of a series of bimetallic-doped **1-Eu<sub>x</sub>Tb<sub>1-x</sub>**.

| Compound                                | Eu content in mol (%) | Tb content in mol (%) |
|-----------------------------------------|-----------------------|-----------------------|
| 1-Eu <sub>0.02</sub> Tb <sub>0.98</sub> | 2.3                   | 97.7                  |
| 1-Eu <sub>0.06</sub> Tb <sub>0.94</sub> | 6.2                   | 93.8                  |
| 1-Eu <sub>0.1</sub> Tb <sub>0.9</sub>   | 9.5                   | 90.5                  |
| 1-Eu <sub>0.2</sub> Tb <sub>0.8</sub>   | 20.4                  | 79.6                  |
| 1-Eu <sub>0.4</sub> Tb <sub>0.6</sub>   | 39.9                  | 60.1                  |
| 1-Eu <sub>0.6</sub> Tb <sub>0.4</sub>   | 60.6                  | 39.4                  |
| 1-Eu <sub>0.8</sub> Tb <sub>0.2</sub>   | 79.8                  | 20.2                  |

**Table S5.** Photoluminescence data of **1-Ln** and **1-Eu<sub>x</sub>Tb<sub>1-x</sub>**.

| Compounds                                   | CIE coordinates | $\tau$ ( $\mu$ s) | $\eta$ (%) |
|---------------------------------------------|-----------------|-------------------|------------|
| <b>1-Tb</b>                                 | (0.29,0.61)     | 816.62            | —          |
| <b>1-Eu<sub>0.02</sub>Tb<sub>0.98</sub></b> | (0.33,0.57)     | 731.37            | 11.04      |
| <b>1-Eu<sub>0.06</sub>Tb<sub>0.94</sub></b> | (0.35,0.55)     | 690.03            | 15.51      |
| <b>1-Eu<sub>0.1</sub>Tb<sub>0.98</sub></b>  | (0.38,0.53)     | 612.38            | 25.11      |
| <b>1-Eu<sub>0.2</sub>Tb<sub>0.8</sub></b>   | (0.49,0.45)     | 589.42            | 27.83      |
| <b>1-Eu<sub>0.4</sub>Tb<sub>0.6</sub></b>   | (0.56,0.39)     | 443.82            | 45.66      |
| <b>1-Eu<sub>0.6</sub>Tb<sub>0.4</sub></b>   | (0.58,0.37)     | 399.23            | 51.12      |
| <b>1-Eu<sub>0.8</sub>Tb<sub>0.2</sub></b>   | (1.63,0.34)     | 387.78            | 52.53      |
| <b>1-Eu</b>                                 | (0.67,0.33)     | 387.73            | —          |

**Table S6.** HOMO and LUMO Energies for H<sub>2</sub>L and MEAA.

| Analytes         | HOMU (eV) | LUMO (eV) | Band Gap (eV) |
|------------------|-----------|-----------|---------------|
| H <sub>2</sub> L | -6.803    | -1.891    | 4.912         |
| MEAA             | -7.151    | -0.016    | 7.135         |

**Table S7.** The hexadecimal color codes of each color block of QR code.



|      |         |         |         |         |    |
|------|---------|---------|---------|---------|----|
| Eu   |         |         |         |         |    |
| 27%  | #455900 | #45FF00 | #451A00 | #451200 |    |
| 100% | #FF5900 | #FFFF00 | #FF1A00 | #FF1200 |    |
| 2%   | #055900 | #05FF00 | #051A00 | #051200 |    |
| 13%  | #215900 | #21FF00 | #211A00 | #211200 |    |
|      | 35%     | 100%    | 10%     | 7%      | Tb |

|      |         |         |         |         |    |
|------|---------|---------|---------|---------|----|
| Tb   |         |         |         |         |    |
| 35%  | #455900 | #FF5900 | #055900 | #215900 |    |
| 100% | #45FF00 | #FFFF00 | #05FF00 | #21FF00 |    |
| 10%  | #451A00 | #FF1A00 | #051A00 | #211A00 |    |
| 7%   | #451200 | #FF1200 | #051200 | #211200 |    |
|      | 27%     | 100%    | 2%      | 13%     | Eu |

|      |         |         |         |         |    |
|------|---------|---------|---------|---------|----|
| Eu   |         |         |         |         |    |
| 27%  | #450000 | #A20000 | #250000 | #330000 |    |
| 100% | #A20000 | #FF0000 | #820000 | #900000 |    |
| 2%   | #250000 | #820000 | #050000 | #130000 |    |
| 13%  | #330000 | #900000 | #130000 | #210000 |    |
|      | 27%     | 100%    | 2%      | 13%     | Eu |

|      |         |         |         |         |    |
|------|---------|---------|---------|---------|----|
| Tb   |         |         |         |         |    |
| 35%  | #005900 | #00AC00 | #003900 | #003500 |    |
| 100% | #00AC00 | #00FF00 | #008C00 | #008800 |    |
| 10%  | #003900 | #008C00 | #001900 | #001500 |    |
| 7%   | #003500 | #008800 | #001500 | #001200 |    |
|      | 35%     | 100%    | 10%     | 7%      | Tb |

## References

- [1] Y. N. Zhou, L. L. Liu, Q. W. Liu, X. X. Liu, M. Z. Feng, L. Wang, Z. G. Sun, and Y. Y. Zhu, *Angew. Chem. Int. Ed.*, 2023, **62**, e202306680.
- [2] Y. Wang, N. Xu, J. Ma, H. Li, Y. Zhang, G. Liu, and X. Wang, *Inorg. Chem.*, 2022, **61**, 7780–7786.
- [3] S. Bej, S. Mandal, A. Mondal, T.K. Pal, and P. Banerjee, *ACS Appl. Mater. Interfaces.*, 2021,

**13**, 25153-25163.

- [4] Y. Zhang, H. Lu, and B. Yan, *Sens. Actuator B-Chem.*, 2021, **349**, 130736.
- [5] Y. F. Zhong, G. M. Bao, M. Qiu, Y. F. Xia, W. Li, Y. Q. Tao, S. Y. Liu, S. H. Li, W. Xiao, Y. Zhang, and H. Q. Yuan, *J. Mater. Chem. A.*, 2017, **5**, 15797- 15807.
- [6] Y. Fei, K. Sun, and L. Liu, *pectrochim. Acta A Mol. Biomol. Spectrosc.*, 2023, **290**, 122244.
- [7] L. Song, F. Tian, and Z. Liu, *J. Solid State Chem.*, 2022, **312**, 123231.
- [8] T. Q. Song, K. Yuan, W. Z. Qiao, Y. Shi, J. Dong, H. L. Gao, X. P. Yang, J. Z. Cui, B. Zhao, *Anal. Chem.*, 2019, **91**, 2595-2599.
- [9] K. Wang, X. L. Lv, D. Feng, J. Li, S. Chen, J. Sun, L. Song, Y. Xie, J. R. Li, and H. C. Zhou, *J. Am. Chem. Soc.*, 2016, **138**, 914-919.
- [10] T. Chen, Y. Ye, M. Yin, L. Chen, Z. Ke, J. Guo, M. Zhang, Z. Yao, Z. Zhang, and S. Xiang, *Cryst. Growth Des.*, 2020, **20**, 2099-2105.
